# Supplementary material
Source: PubMed Central journal article supplement (PMC3392372)
Supplement: 11999_2012_2259_MOESM1_ESM.pdf [file 11999_2012_2259_MOESM1_ESM.pdf]

# A Survey of the Ethnic and Racial Distribution in Orthopaedic Residency

## 1. Introduction

Dear Orthopaedic Residency Coordinators,

We are conducting a follow-up survey to our 1995 publication that examined the racial and ethnic composition of orthopaedic residency programs in the United States. Our original study, entitled "A Survey of the Ethnic and Racial Distribution in Orthopedic Residency Programs in the United States" and published in the September 1999 issue of the Journal of the National Medical Association (vol. 91, no.9) concluded that African Americans and Hispanics were underrepresented in orthopaedic residency educational programs compared with their numbers in the general population. The percentage of residents in these two minority groups was also below goals established by the Council on Graduate Medical Education (COGME) and the U.S. Government's Healthy People 2000 report.

According to the COGME, the racial/ethnic composition of the physician workforce does not reflect that of the current U.S. census data, and that discrepancy contributes to access problems experienced by minorities seeking subspecialty care\*. In 1995, African Americans comprised 12.6% of the population and only 3.6% of orthopaedic residents; while Hispanics comprised 10.2% of the population and 3% of orthopaedic residents. Data collected in this survey will help us better understand the current ethnic and racial composition in orthopaedic residency programs in the United States and assess the status of underrepresented minorities and women. 2010 metrics will help us determine what progress has been made in the 15 years since our previous survey.

Our survey is composed of three sections, and is comprised of 15 questions. The first section pertains to orthopaedic residents, the second pertains to orthopaedic faculty/attendings, and the third applies to research faculty. We anticipate that the survey will take only 5 to 10 minutes for completion.

Thank you very much for participating in this critical follow-up survey. Please do not hesitate to contact me if you have any questions.

Sincerely,

Richard E. Grant, M.D.,  
Professor of Orthopaedic Surgery  
Edgar Jackson Jr. M.D. Chairperson for Diversity and Clinical Excellence  
Department of Orthopaedic Surgery  
University Hospitals of Cleveland  
Case Western Reserve University  
11100 Euclid Avenue  
Cleveland, Ohio 44106-5000  
(216) 844-1118  
richard.grant@uhhospitals.org

\*Council on Graduate Medical Education. Improving Access to Health Care Through Physician Workforce Reform. Directions for the 21st Century: Third Report to Congress and the Secretary of Health and Human Services. Rockville, MD Health Resources and Services Administration; 1992

# A Survey of the Ethnic and Racial Distribution in Orthopaedic Residency

## 2. Instructions

The survey is composed of three sections, and is comprised of 15 questions. The first section pertains to orthopaedic residents, the second pertains to orthopaedic faculty/attendings, and the third applies to research faculty. We anticipate that the survey will take only 5 to 10 minutes for completion.

The majority of questions require numerical answers. Please answer each question appropriately. If you need to exit the survey, your answer choices will be saved and you will be able to resume the survey at a later time.

We understand that your time is very important, therefore we have made this survey as concise as possible. If feasible, please respond within the next 4 weeks.

Thank you again for your time and participation.

# A Survey of the Ethnic and Racial Distribution in Orthopaedic Residency

## 3. Orthopaedic Residents

### 1. What is the total number of residents in your orthopaedic residency program, PGY-1 through PGY-5?

Total number of residents

### 2. What is the gender distribution of orthopaedic residents in the program?

Female

Male

### 3. What is the racial distribution (as self-identified) of the residents currently in your orthopaedic program

White/Caucasian

Black/African-American

Hispanic/Latino/Spanish

American Indian/Alaskan

Asian Indian

Chinese

Filipino

Japanese

Korean

Vietnamese

Native Hawaiian

Chamorro (Guamanian)

Samoan

Other Pacific Islander

Other Asian

Other race

### 4. What percentage of your 2009 orthopaedic residency graduates (PGY 5+) have secured post-residency orthopaedic fellowships?

Percentage of female graduates

Percentage of male graduates

## A Survey of the Ethnic and Racial Distribution in Orthopaedic Residency

### 5. To which types of fellowships have your 2009 residency graduates been accepted? (Check all that apply)

- Sports
- Spine
- Hand/upper extremity
- Pediatric orthopaedics
- Total joint arthroplasty
- Shoulder/elbow
- Trauma
- Tumors/musculoskeletal oncology
- Research
- Foot and Ankle

# A Survey of the Ethnic and Racial Distribution in Orthopaedic Residency

## 4. Orthopaedic Faculty/Attendings

**1. What is the total number of full-time orthopaedic faculty/attendings at your medical center?**

Full-time   
faculty/attendings

**2. What is the gender distribution of your full-time orthopaedic faculty/attendings?**

Female

Male

**3. What is the total number of part-time orthopaedic faculty/attendings at your medical center?**

Part-time   
faculty/attendings

**4. What is the gender distribution of your part-time orthopaedic faculty/attendings?**

Female

Male

**5. What is the racial distribution (as self-identified) of all current orthopaedic faculty/attendings?**

White/Caucasian

Black/African-American

Hispanic/Latino/Spanish

American

Indian/Alaskan

Asian Indian

Chinese

Filipino

Japanese

Korean

Vietnamese

Native Hawaiian

Chamorro (Guamanian)

Samoan

Other Pacific Islander

Other Asian

Other race

# A Survey of the Ethnic and Racial Distribution in Orthopaedic Residency

## 6. What is the classification of your sponsoring institution's orthopaedic program?

- University affiliated
- State sponsored
- Private
- Local
- Non-university affiliated
- Federal
- Military

## 5. Orthopaedic Research Faculty

### 1. What is the total number of research faculty at your medical center? (doctors of philosophy, clinical and basic scientists, etc.)

Orthopaedic research faculty

### 2. What is the gender distribution of the research faculty?

Female

Male

### 3. What is the racial distribution (as self-identified) of the orthopaedic research faculty?

White/Caucasian

Black/African-American

Hispanic/Latino/Spanish

American Indian/Alaskan

Asian Indian

Chinese

Filipino

Japanese

Korean

Vietnamese

Native Hawaiian

Chamorro (Guamanian)

Samoan

Other Pacific Islander

Other Asian

Other race

### 4. Additional Comments or Suggestions

# A Survey of the Ethnic and Racial Distribution in Orthopaedic Residency

## 5. Please complete the information below

**Name of Residency**

**Program**

**Name of Residency**

**Program**

**Coordinator:**

**Address:**

**Building/Room/Suite:**

**City:**

**State:**

**ZIP:**

**Name of Department**

**Chairperson**

**Name of Program**

**Director**



## 6. Thank You

Thank you very much for your participation in our study.

Richard E. Grant, M.D.,  
Professor of Orthopaedic Surgery  
Edgar Jackson Jr. M.D. Chairperson for Diversity and Clinical Excellence  
Department of Orthopaedic Surgery  
University Hospitals of Cleveland  
Case Western Reserve University  
11100 Euclid Avenue  
Cleveland, Ohio 44106-5000  
(216) 844-1118  
richard.grant@uhhospitals.org
